# Supplementary material
Source: PubMed Central journal article supplement (PMC4262617)
Supplement: NIHMS626839-supplement.pdf [file NIHMS626839-supplement.pdf]

235  
 236 7. Supplemental Information  
 237 7.1. Introduction

Table S1. Novel brominated flame retardants measured in dust samples.(Bergman and others 2012)

| Chemical Name                                                   | Abbreviations <sup>a</sup><br>Common<br><b>Practical</b><br><i>Structural</i> | Structure                                |
|-----------------------------------------------------------------|-------------------------------------------------------------------------------|------------------------------------------|
| CAS #                                                           |                                                                               |                                          |
| $\alpha$ , $\beta$ -1,2-Dibromo-4-(1,2-dibromoethyl)cyclohexane | TBEC<br>BrCyHx<br>TBECH<br><b>DBE-DBCH</b><br><i>DiBEt-DiBcH</i>              | <br>$\beta$ -DBE-DBCH $\alpha$ -DBE-DBCH |
| 3322-93-8                                                       |                                                                               |                                          |
| 2-bromoallyl 2,4,6-tribromophenyl ether                         | <b>BATE</b>                                                                   |                                          |
| —                                                               |                                                                               |                                          |
| Pentabromotoluene                                               | PBT<br><b>PBT</b><br><i>PeBT</i>                                              |                                          |
| 878-83-2                                                        |                                                                               |                                          |
| Pentabromoethylbenzene                                          | PeBrEtBz<br>PBEB<br><b>PBEB</b><br><i>PeBEtBz</i>                             |                                          |
| 85-22-3                                                         |                                                                               |                                          |
| 2,3-dibromopropyl 2,4,6-tribromophenyl ether                    | DPTE<br><b>TBP-DBPE</b><br><i>TrBPh-DiBPrE</i>                                |                                          |
| 35109-60-5                                                      |                                                                               |                                          |

Table S1. Novel brominated flame retardants measured in dust samples.(Bergman and others 2012)

| Chemical Name                           | Abbreviations <sup>a</sup><br>Common<br><b>Practical</b><br><i>Structural</i>           | Structure                                                                            |
|-----------------------------------------|-----------------------------------------------------------------------------------------|--------------------------------------------------------------------------------------|
| Hexabromobenzene                        | HxBz<br>HBB<br><b>HBB</b><br><i>HxBBz</i>                                               | 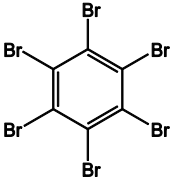   |
| 2-ethylhexyl-2,3,4,5-tetrabromobenzoate | EHTeBB<br>EHTBB<br>TBB<br><b>EH-TBB</b><br><i>EtH-TeBBzo</i>                            |    |
| 1,2-bis(2,4,6-tribromophenoxy)ethane    | TBEHxBrPoxE<br>BTBPE<br><b>BTBPE</b><br><i>bTBPhOEt</i>                                 |   |
| bis(2-ethylhexyl)tetrabromophthalate    | TeBrDEHP<br>BEHTBP<br>TBPH<br><b>BEH-TEBP</b><br><i>bEtH-TeBPh</i>                      |  |
| Decabromodiphenylethane                 | DBDE<br>EBPE<br>DeBrPylE<br>DBDPE<br><b>DBDPE</b><br><b>BDPE-209</b><br><i>DBDiPhEt</i> |  |

<sup>a</sup> Common (Roman type) abbreviations are those currently in use. **Practical** (bold) abbreviations and *Structural* (italics) abbreviations are those suggested by Bergman et al (Bergman and others 2012) in an attempt to standardize the abbreviations used for flame retardants.

6 244 7.2. Methods and Materials  
7

8 245 7.2.1. Materials  
9

10  
11  
12 246 Solvents (dichloromethane, hexane) were JT Baker Ultra-Resi-Analyzed® grade, and were used  
13  
14  
15 247 as is. Tetradecane was EMD Millipore 99%, and was used as is. Hydromatrix™ was used as the  
16  
17 248 bulking agent for sample extraction, and was solvent rinsed prior to use. Silica gel (Fisher  
18  
19  
20 249 Scientific, 70-230 mesh, Grade 40) and anhydrous sodium sulfate were solvent rinsed  
21  
22 250 immediately prior to use. Native and <sup>13</sup>C-labeled standards were purchased from Wellington  
23  
24  
25 251 Laboratories (Guelph, Ontario, Canada). The Standard Reference Material, SRM 2585 Organic  
26  
27 252 Contaminants in House Dust, was purchased from The National Institute of Science and  
28  
29  
30 253 Technology, Gaithersburg, MD, USA.  
31  
32

33 254 7.2.2. Equipment  
34  
35  
36

37 255 A Thermo (formerly Dionex) ASE 200 was used to extract the samples. ASE extracts were  
38  
39  
40 256 concentrated to less than 700 µL using a TurboVap 500 (Caliper Life Sciences). Silica gel  
41  
42  
43 257 columns and a Waters high pressure gel permeation chromatography (GPC) system comprising a  
44  
45 258 1515 isocratic pump; a 2489 dual wavelength absorbance detector; a 717 Plus autosampler; and a  
46  
47  
48 259 Fraction Collector III, were used for sample cleanup. The GPC eluate was concentrated to less  
49  
50 260 than 300 µL using a Rapid-Vap/Rapid-Trap solvent reduction system (LabConco). Final extracts  
51  
52  
53 261 were concentrated using a six port Mini-Vap (Supelco).  
54  
55

56 262 Sample extracts were analyzed using a Thermo DFS high resolution gas chromatography/mass  
57  
58  
59 263 spectrometry (GC/MS) system (dual GC configuration). This system consisted of a DFS high  
60  
61  
62  
63  
64  
65

264 resolution mass spectrometer, a Tri-Plus Extended Rail autosampler, and two Thermo Trace  
 265 Ultra GCs. Each GC was equipped with a split/splitless injector, a programmed temperature  
 266 vaporizing (PTV) injector, and electronic flow control. The analytical column for NBFR analysis  
 267 was an Agilent/J&W DB5- MS (15m x 0.25 mm id x 0.25  $\mu$ m film) with helium as the carrier  
 268 gas.

### 7.2.3. Sample Analysis

Table S2. Mass spec parameters for the NBFRs, in order of retention time.

| Analyte                 | Quantitation Mass | Ratio Mass | Internal Standard       |
|-------------------------|-------------------|------------|-------------------------|
| DBE-DBCH                | 266.9202          | 264.9222   | <sup>13</sup> C-HBB     |
| BATE                    | 329.7708          | 331.7688   | <sup>13</sup> C-HBB     |
| PBT                     | 485.6105          | 487.6085   | <sup>13</sup> C-HBB     |
| PBEB                    | 499.6262          | 501.6241   | <sup>13</sup> C-HBB     |
| TBP-DBPE                | 329.7708          | 331.7688   | <sup>13</sup> C-HBB     |
| HBB                     | 549.5054          | 547.5074   | <sup>13</sup> C-HBB     |
| <sup>13</sup> C-HBB     | 557.5235          | 559.5214   | <sup>13</sup> C-BDE-154 |
| EH-EH-TBB               | 420.6714          | 418.6735   | <sup>13</sup> C-BTBPE   |
| <sup>13</sup> C-BDE-154 | 495.7352          | 493.7372   | Recovery Stnd           |
| BTBPE                   | 356.7943          | 358.7922   | <sup>13</sup> C-BTBPE   |
| <sup>13</sup> C-BTBPE   | 364.8211          | 366.8191   | <sup>13</sup> C-BDE-154 |
| BEH-TEBP                | 464.6613          | 462.6633   | <sup>13</sup> C-BTBPE   |
| DBDPE                   | 484.6027          | 486.6006   | <sup>13</sup> C-DBDPE   |
| <sup>13</sup> C-DBDPE   | 491.6262          | 493.6241   | <sup>13</sup> C-BDE-154 |

270

7.3. QA/QC Results

Table S3. Descriptive Statistics for Analysis of Contemporary House Dust and SRM 2585 House Dust QC Samples  
 All concentrations in ng/g.

|            | Contemporary House Dust (n=5) |        |         |        |        |        | SRM-2585 (n=7) |        |         |        |        |        |
|------------|-------------------------------|--------|---------|--------|--------|--------|----------------|--------|---------|--------|--------|--------|
|            | % Detects                     | Mean   | Std Dev | Min    | Median | Max    | % Detects      | Mean   | Std Dev | Min    | Median | Max    |
| β-DBE-DBCH | 100                           | 2.86   | 2.10    | 1.37   | 1.50   | 6.04   | 42.9           | 2.19   | 2.31    | < 0.64 | < 0.64 | 6.62   |
| α-DBE-DBCH | 100                           | 2.62   | 1.82    | 1.25   | 1.61   | 5.38   | 42.9           | 1.74   | 1.67    | < 0.64 | < 0.64 | 4.96   |
| BATE       | 0                             | < 0.64 |         | < 0.64 | < 0.64 | < 0.64 | 0              | < 0.64 | 0       | < 0.64 | < 0.64 | < 0.64 |
| PBT        | 0                             | < 0.64 |         | < 0.64 | < 0.64 | < 0.64 | 0              | < 0.64 | 0       | < 0.64 | < 0.64 | < 0.64 |
| PBEB       | 0                             | < 0.64 |         | < 0.64 | < 0.64 | < 0.64 | 85.7           | 8.96   | 3.69    | < 0.64 | 10.3   | 10.9   |
| TBP-DBPE   | 0                             | < 0.64 |         | < 0.64 | < 0.64 | < 0.64 | 0              | < 0.64 | 0       | < 0.64 | < 0.64 | < 0.64 |
| HBB        | 100                           | 2.69   | 0.29    | 2.23   | 2.78   | 3.01   | 83.3           | 4.45   | 1.9     | < 0.64 | 5.2    | 5.5    |
| EH-TBB     | 100                           | 895    | 123     | 731    | 905    | 1032   | 85.7           | 53.8   | 30.9    | < 0.64 | 52.0   | 102.4  |
| BEH-TEBP   | 100                           | 148    | 46.9    | 101    | 156    | 208    | 85.7           | 502    | 279     | < 0.64 | 544    | 874    |
| BTBPE      | 100                           | 22.5   | 2.52    | 20.3   | 22.5   | 24.7   | 85.7           | 62.2   | 30.0    | < 0.64 | 65.9   | 97.8   |
| DBDPE      | 100                           | 5.85   | 1.00    | 5.19   | 5.45   | 7.31   | 0              | < 2.6  | 0       | < 2.6  | < 2.6  | < 2.6  |

7.4. Discussion

Table S4. PBDE concentrations for 59 NCCLS and 27 FOX samples used for NBFR analysis.  
 All concentrations in ng/g.

|         | NCCLS (Whitehead and others 2013a) |      |        |       | FOX (Shen and others 2012) |      |        |        |
|---------|------------------------------------|------|--------|-------|----------------------------|------|--------|--------|
|         | Mean                               | Min  | Median | Max   | mean                       | min  | median | Max    |
| BDE-28  | 50.1                               | 0.75 | 18.9   | 468   | 113                        | 6.60 | 40.3   | 620    |
| BDE-32  | <MRL                               | <MRL | <MRL   | <MRL  | 6.18                       | <MRL | <MRL   | 165    |
| BDE-47  | 3330                               | 40.6 | 1290   | 49800 | 14600                      | 1310 | 5170   | 94900  |
| BDE-66  | 56.0                               | 0.96 | 24.5   | 609   | 301                        | 18.9 | 96.3   | 2620   |
| BDE-71  | 70.8                               | 1.67 | 37.4   | 1080  | 482                        | <MRL | 120    | 3310   |
| BDE-99  | 5110                               | 47.5 | 1830   | 67600 | 31000                      | 2450 | 9240   | 201000 |
| BDE-100 | 823                                | 8.50 | 330    | 11800 | 5430                       | 485  | 1720   | 36000  |
| BDE-153 | 623                                | 8.30 | 297    | 4820  | 3990                       | 332  | 1220   | 23200  |
| BDE-154 | 356                                | 3.28 | 148    | 3040  | 2860                       | 250  | 919    | 18100  |
| BDE-155 | 10.5                               | 0.21 | 8.13   | 185   | 167                        | 17.3 | 51.1   | 1160   |
| BDE-179 | 11.3                               | 0.12 | 9.78   | 31.8  | 13.7                       | <MRL | <MRL   | 122    |
| BDE-183 | 107                                | 3.37 | 19.2   | 1170  | 151                        | 16.9 | 77.9   | 644    |
| BDE-190 | 6.21                               | 0.26 | 1.82   | 70.9  | 13.1                       | <MRL | 8.90   | 57.5   |
| BDE-196 | 29.7                               | 2.27 | 8.99   | 456   | 106                        | 9.47 | 76.6   | 399    |
| BDE-197 | 37.6                               | 1.94 | 7.42   | 829   | 63.1                       | 6.29 | 51.1   | 255    |
| BDE-201 | 19.5                               | 0.93 | 3.64   | 726   | 67.0                       | 7.36 | 48.4   | 312    |
| BDE-202 | 2.50                               | 0.19 | 1.19   | 42.7  | 23.0                       | 2.33 | 17.5   | 91.6   |
| BDE-203 | 23.2                               | 3.18 | 8.89   | 285   | 105                        | 9.6  | 81.5   | 362    |
| BDE-206 | 134                                | 24.3 | 75.4   | 777   | 1860                       | 214  | 1130   | 9680   |
| BDE-207 | 100                                | 17.4 | 54.2   | 666   | 852                        | 109  | 592    | 4570   |
| BDE-208 | 56.4                               | 8.58 | 31.6   | 653   | 488                        | 60.4 | 379    | 2250   |
| BDE-209 | 4740                               | 691  | 2520   | 31200 | 78200                      | 8070 | 47000  | 391000 |
